# Supplementary material for: The Impact and Progression of the COVID-19 Pandemic in Bulgaria in Its First Two Years
Source: MDPI journal article supplement (doi:10.3390/vaccines10111901), 2022-11-10
Supplement: s1 [file vaccines-2000899-supplementary.pdf › vaccines-2000899-supplementary.pdf]

## Supplementary Figures

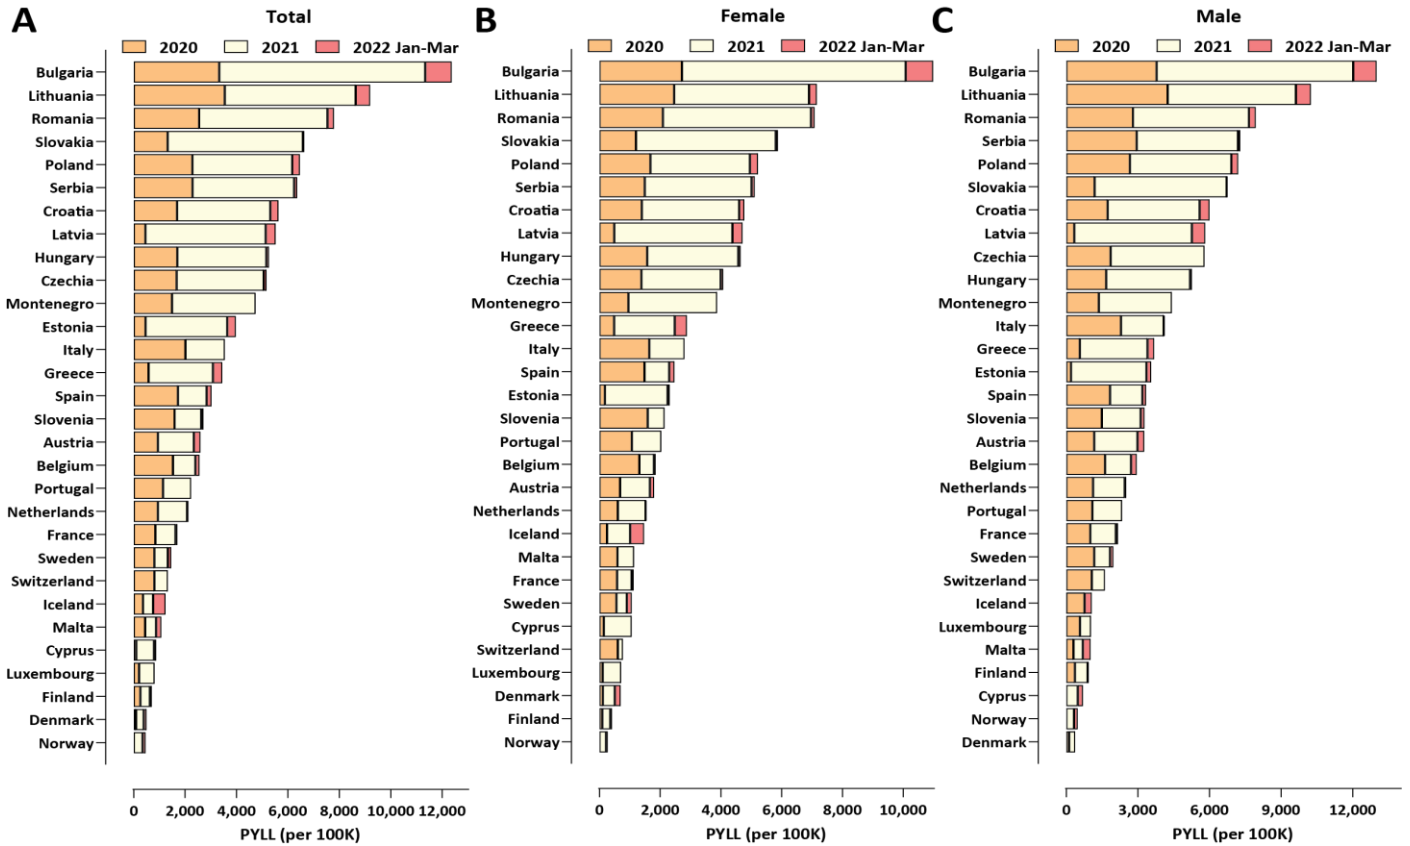

Supplementary Figure S1: Excess mortality in Europe and Bulgaria during the COVID-19 pandemic (up to the end of March 2022). (A) Standardized PYLL values, total; (B) Standardized PYLL values, females; (C) Standardized PYLL values, males.

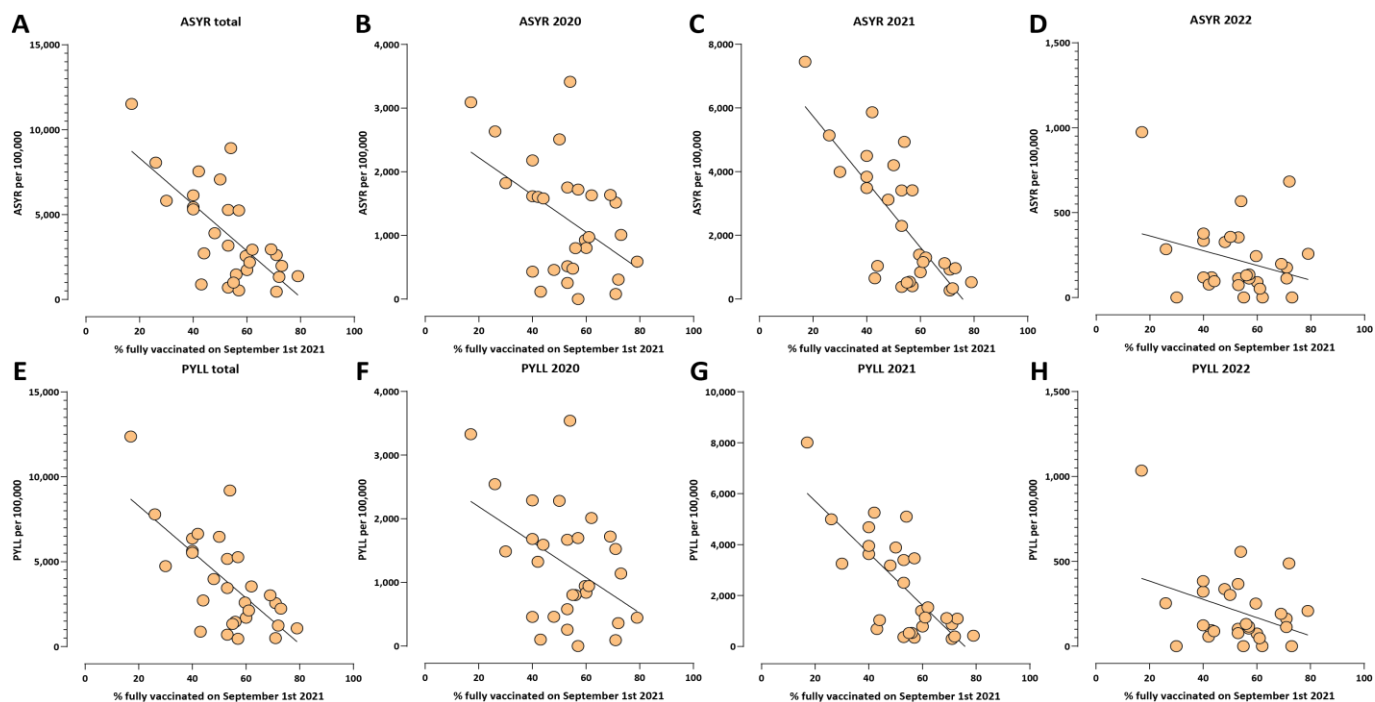

**Supplementary Figure S2: Correlation between rates of full vaccination and ASYR and PYLL excess mortality measures in European countries.**

(A) ASYR, total (Pearson  $R^2 = 0.5$ ,  $p \leq 0.0001$ ; Spearman  $r = -0.64$ ,  $p = 0.0002$ );

(B) ASYR, 2020 (Pearson  $R^2 = 0.22$ ,  $p = 0.0105$ ; Spearman  $r = -0.36$ ,  $p = 0.0549$ );

(C) ASYR, 2021 (Pearson  $R^2 = 0.57$ ,  $p \leq 0.0001$ ; Spearman  $r = -0.69$ ,  $p \leq 0.0001$ );

(D) ASYR, 2022 (Pearson  $R^2 = 0.08$ ,  $p = 0.1286$ ; Spearman  $r = -0.2$ ,  $p = 0.2982$ );

(E) PYLL, total (Pearson  $R^2 = 0.47$ ,  $p \leq 0.0001$ ; Spearman  $r = -0.62$ ,  $p = 0.0003$ );

(F) PYLL, 2020 (Pearson  $R^2 = 0.19$ ,  $p = 0.0169$ ; Spearman  $r = -0.32$ ,  $p = 0.08$ );

(G) PYLL, 2021 (Pearson  $R^2 = 0.56$ ,  $p \leq 0.0001$ ; Spearman  $r = -0.65$ ,  $p = 0.0001$ );

(H) PYLL, 2022 (Pearson  $R^2 = 0.13$ ,  $p = 0.0523$ ; Spearman  $r = -0.19$ ,  $p = 0.3106$ ).

|                    | ASYR  |       |        | PYLL  |       |        |
|--------------------|-------|-------|--------|-------|-------|--------|
|                    | all   | male  | female | all   | male  | female |
| <b>Austria</b>     | 12.17 | 14.38 | 8.98   | 12.32 | 13.38 | 10.36  |
| <b>Belgium</b>     | 11.84 | 14.05 | 8.31   | 11.59 | 12.49 | 9.23   |
| <b>Bulgaria</b>    | 11.70 | 12.70 | 10.43  | 12.57 | 12.02 | 12.51  |
| <b>Croatia</b>     | 11.33 | 12.99 | 9.53   | 11.75 | 11.51 | 11.23  |
| <b>Cyprus</b>      | 16.54 | n/a   | 24.30  | 16.48 | n/a   | 22.38  |
| <b>Czechia</b>     | 12.84 | 14.48 | 10.70  | 12.58 | 12.57 | 11.67  |
| <b>Denmark</b>     | 10.29 | 7.62  | 16.74  | 11.26 | 8.04  | 17.70  |
| <b>Estonia</b>     | 14.32 | 17.65 | 9.17   | 14.59 | 15.29 | 11.52  |
| <b>Finland</b>     | 15.56 | 19.03 | 7.86   | 15.56 | 17.64 | 10.08  |
| <b>France</b>      | 12.71 | 14.37 | 9.31   | 12.47 | 12.82 | 10.31  |
| <b>Greece</b>      | 12.94 | 13.84 | 10.61  | 14.10 | 14.07 | 12.60  |
| <b>Hungary</b>     | 14.97 | 15.98 | 13.21  | 15.02 | 14.18 | 14.57  |
| <b>Iceland</b>     | 24.40 | 27.33 | 22.86  | 22.87 | 23.46 | 21.12  |
| <b>Italy</b>       | 9.47  | 11.27 | 7.52   | 11.45 | 12.21 | 10.37  |
| <b>Latvia</b>      | 13.20 | 17.17 | 9.07   | 13.74 | 15.42 | 11.50  |
| <b>Lithuania</b>   | 13.94 | 16.27 | 10.41  | 14.38 | 14.57 | 12.40  |
| <b>Luxembourg</b>  | 27.49 | 26.56 | 18.90  | 27.01 | 25.21 | 19.48  |
| <b>Malta</b>       | 12.83 | 18.13 | 10.36  | 10.07 | 13.11 | 9.41   |
| <b>Montenegro</b>  | 13.37 | 13.95 | 12.22  | 10.90 | 9.74  | 10.96  |
| <b>Netherlands</b> | 12.00 | 12.96 | 11.03  | 11.68 | 11.56 | 11.56  |
| <b>Poland</b>      | 14.80 | 16.99 | 12.03  | 13.54 | 13.47 | 12.39  |
| <b>Portugal</b>    | 9.31  | 11.19 | 7.96   | 10.51 | 11.03 | 10.26  |
| <b>Romania</b>     | 13.10 | 14.08 | 12.00  | 12.66 | 11.86 | 12.93  |
| <b>Serbia</b>      | 12.30 | 13.17 | 11.05  | 12.75 | 12.48 | 12.46  |
| <b>Slovakia</b>    | 15.55 | 17.54 | 13.01  | 13.68 | 13.41 | 12.82  |
| <b>Slovenia</b>    | 11.34 | 14.53 | 7.70   | 11.34 | 12.12 | 9.29   |
| <b>Spain</b>       | 12.62 | 13.93 | 10.19  | 12.91 | 12.83 | 11.63  |
| <b>Sweden</b>      | 11.27 | 13.38 | 8.34   | 11.19 | 12.34 | 9.38   |
| <b>Switzerland</b> | 7.53  | 9.76  | 3.50   | 10.07 | 11.23 | 7.18   |

**Supplementary Figure S3: Year of life lost per excess death in European countries.** Note that the very high values for a few countries (e.g. Cyprus, Iceland, Luxembourg, Finland, Malta) might be artifacts resulting from significantly insignificant excess deaths (z-score significantly below 2).

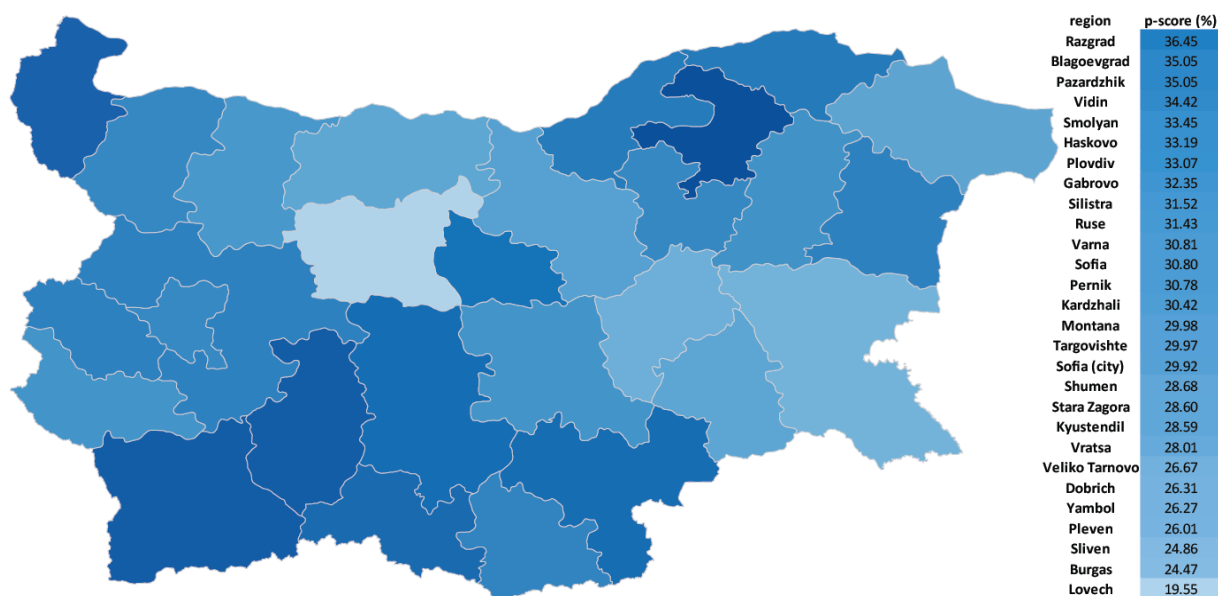

Supplementary Figure S4: Excess mortality in Bulgarian regions (P-scores).

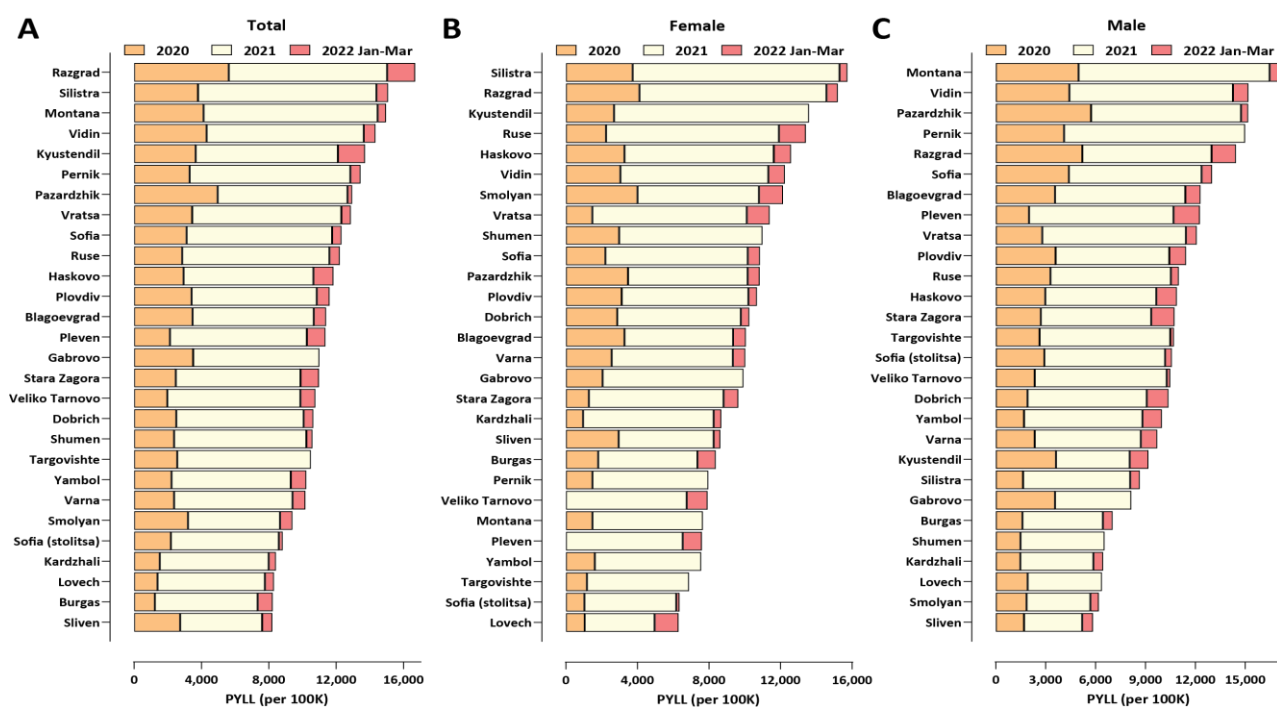

Supplementary Figure S5: Regional excess mortality patterns in Bulgaria during the COVID-19 pandemic (up to the end of March 2022). (A) Total, standardized PYLL values; (B) Female, standardized PYLL values; (C) Male, standardized PYLL values.

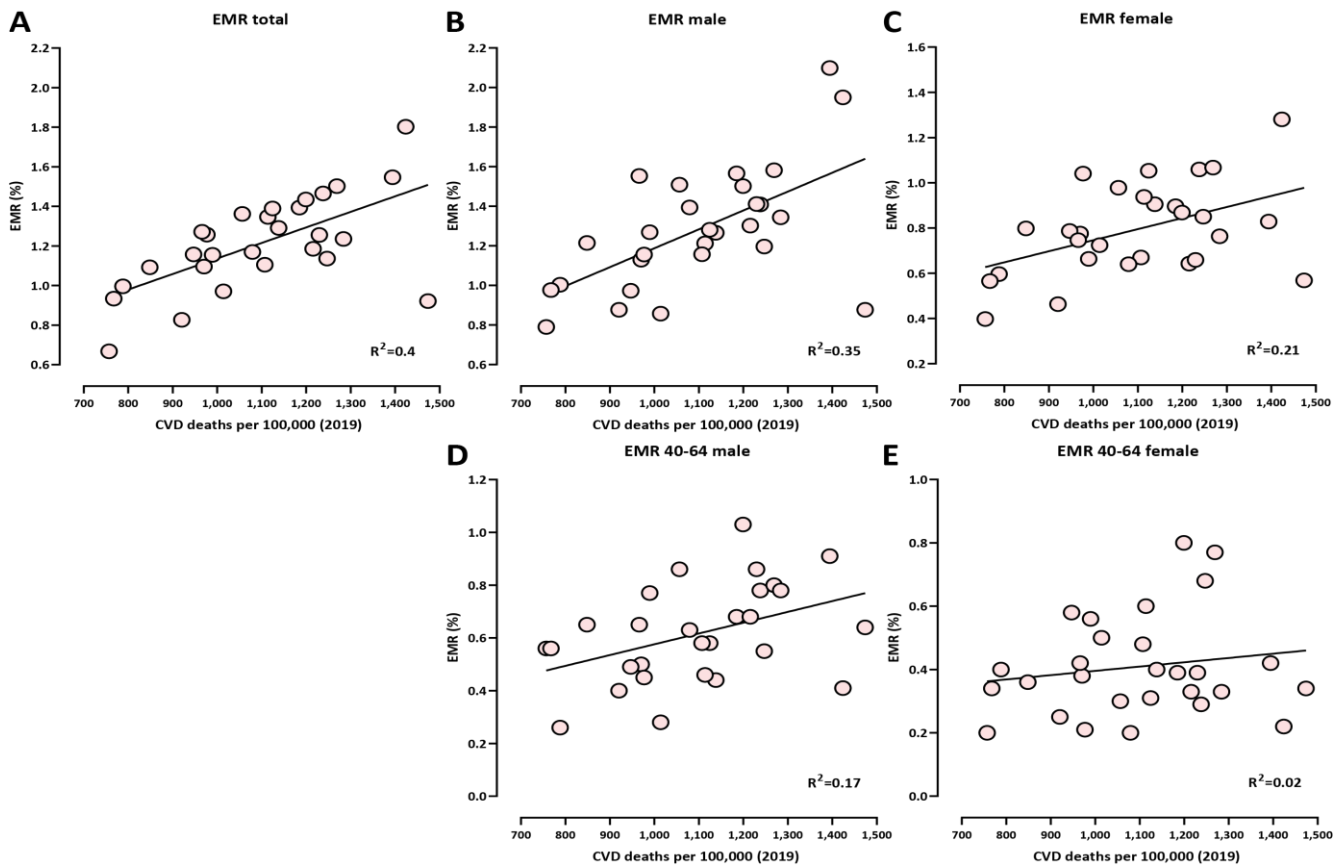

**Supplementary Figure S6: Correlation between cardiovascular disease (CVD) prevalence (measured as the deaths from CVD per 100,000 people in 2019) and COVID-related excess mortality in Bulgarian regions (as measured by EMR). Shown is the Pearson  $R^2$  correlation coefficient.**

(A) total (Pearson  $R^2=0.4$ ,  $p=0.0003$ ; Spearman  $r=0.59$ ,  $p=0.0008$ );

(B) males (Pearson  $R^2=0.35$ ,  $p=0.0009$ ; Spearman  $r=0.57$ ,  $p=0.0014$ );

(C) females (Pearson  $R^2=0.21$ ,  $p=0.0129$ ; Spearman  $r=0.43$ ,  $p=0.0196$ );

(D) males ages 40-64 (Pearson  $R^2=0.17$ ,  $p=0.026$ ; Spearman  $r=0.43$ ,  $p=0.0214$ );

(E) females ages 40-64 (Pearson  $R^2=0.02$ ,  $p=0.41$ ; Spearman  $r=0.12$ ,  $p=0.51$ ).

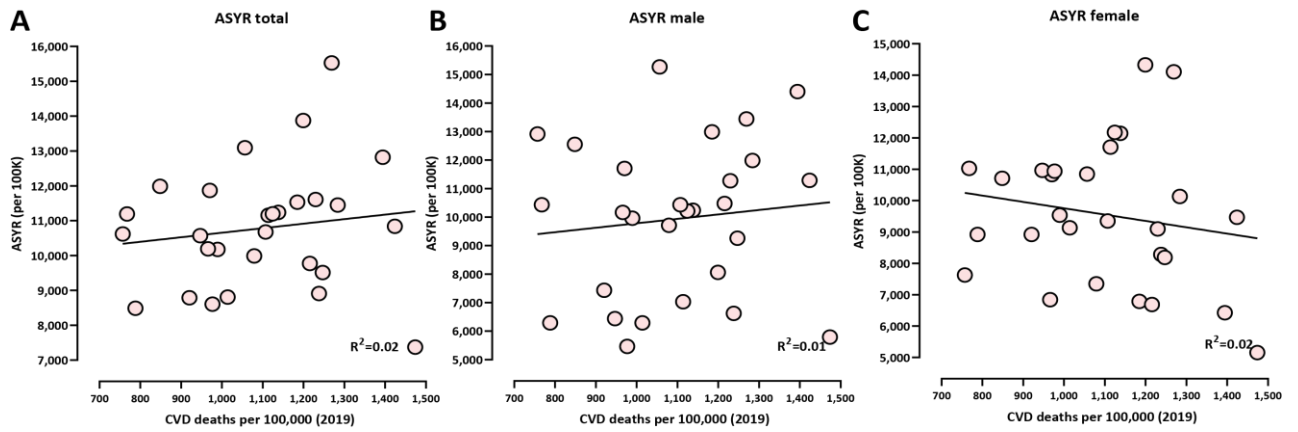

**Supplementary Figure S7: Correlation between cardiovascular disease (CVD) prevalence (measured as the deaths from CVD per 100,000 people in 2019) and COVID-related excess mortality in Bulgarian regions (as measured by ASYR). Shown is the Pearson  $R^2$  correlation coefficient.**

- (A) total (Pearson  $R^2 = 0.02$ ,  $p = 0.47$ ; Spearman  $r = 0.18$ ,  $p = 0.35$ );
- (B) males (Pearson  $R^2 = 0.01$ ,  $p = 0.31$ ; Spearman  $r = 0.15$ ,  $p = 0.44$ );
- (C) females (Pearson  $R^2 = 0.03$ ,  $p = 0.79$ ; Spearman  $r = -0.16$ ,  $p = 0.40$ ).
